# Supplementary material for: Impacts of tropical cyclone-heatwave compound events on surface ozone in eastern China: Comparison between the Yangtze River and Pearl River Deltas
Source: Copernicus journal article supplement (doi:10.5194/egusphere-2024-846), 2024-06-04
Supplement: Supplementary file 1 [file egusphere-2024-846-supplement.pdf]

1 Supporting Information for

2 **Impacts of tropical cyclone-heatwave compound events on surface ozone in eastern China:**  
3 **Comparison between the Yangtze River and Pearl River Deltas**

4  
5 Cuini Qi<sup>1</sup>, Pinya Wang<sup>1,\*</sup>, Yang Yang<sup>1,\*</sup>, Huimin Li<sup>1</sup>, Hui Zhang<sup>1</sup>, Lili Ren<sup>2</sup>, Xipeng Jin<sup>1</sup>,  
6 Chenchao Zhan<sup>3</sup>, Jianping Tang<sup>4</sup>, Hong Liao<sup>1</sup>

7 <sup>1</sup>Jiangsu Key Laboratory of Atmospheric Environment Monitoring and Pollution Control, Jiangsu  
8 Collaborative Innovation Center of Atmospheric Environment and Equipment Technology, Joint  
9 International Research Laboratory of Climate and Environment Change, School of Environmental  
10 Science and Engineering, Nanjing University of Information Science and Technology, Nanjing,  
11 Jiangsu, China

12 <sup>2</sup>College of Environment and Ecology, Jiangsu Open University, Nanjing, Jiangsu, China

13 <sup>3</sup>School of Atmospheric Physics, Nanjing University of Information Science and Technology,  
14 Nanjing, Jiangsu, China

15 <sup>4</sup>School of Atmospheric Sciences, Nanjing University, Nanjing, Jiangsu, China

16  
17  
18  
19  
20 Correspondence to: P. Wang, [pinya.wang@nuist.edu.cn](mailto:pinya.wang@nuist.edu.cn)

21 Y. Yang, [yang.yang@nuist.edu.cn](mailto:yang.yang@nuist.edu.cn)

22

23

24 **Contents of this file**

25 Figures S1 to S5

26

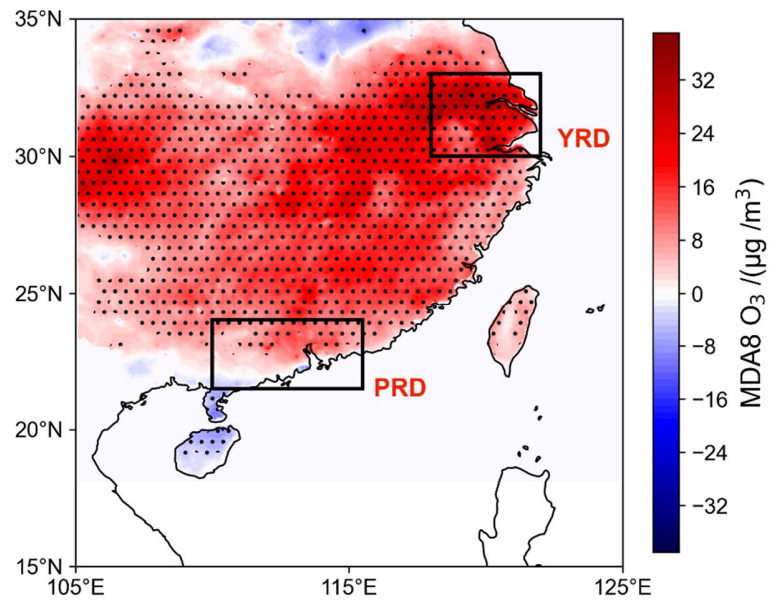

27

28 **Figure S1.** Spatial distributions of ground-level MDA8 ozone concentration anomalies averaged  
29 for TC-HDs compared to those during the periods of TC occurring alone. YRD and PRD regions  
30 are outlined in black boxes in panel.

31

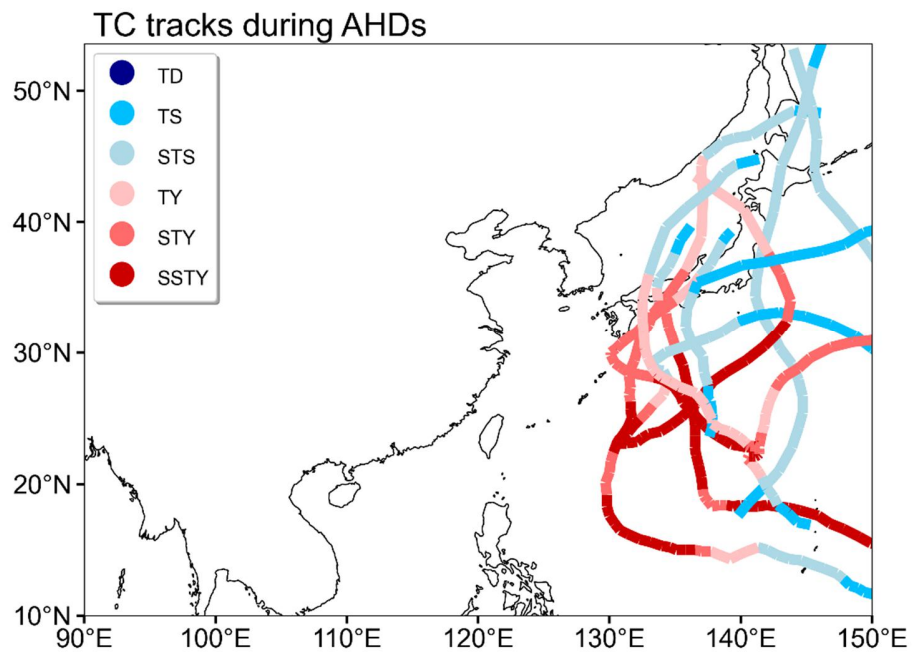

32

33 **Figure S2.** The tracks and intensity of tropical cyclones observed during the AHDs period.

34

35

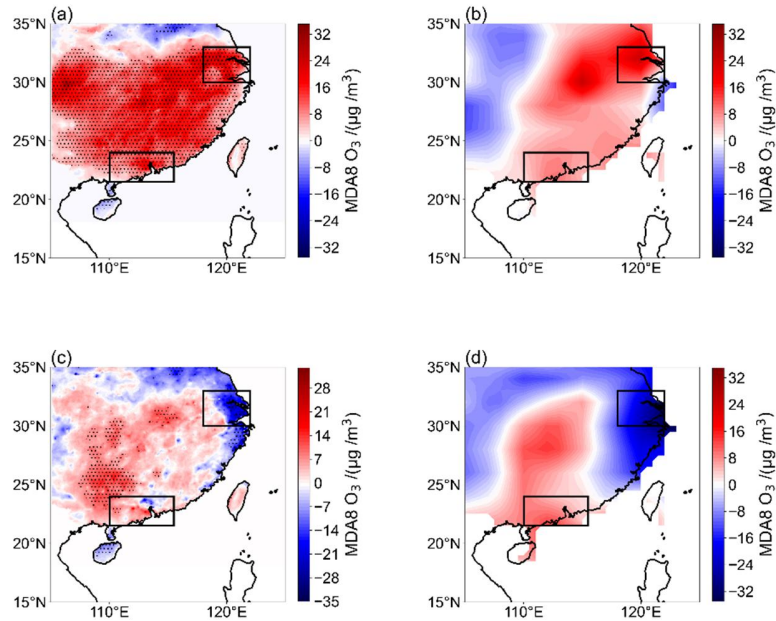

36

37 **Figure S3.** (a) Spatial distributions of observed ground-level MDA8 ozone concentration anomalies  
38 during TC-HDs relative to the summer climatology. (b) Spatial distribution of simulated ground-level  
39 MDA8 ozone concentration anomalies during the TC-HDs relative to the summer climatology. (c)  
40 Spatial distributions of observed ground-level MDA8 ozone concentration anomalies during TC-HDs  
41 relative to AHDs. (d) Spatial distribution of simulated ground-level MDA8 ozone concentration  
42 anomalies during the TC-HDs relative to the AHDs. YRD and PRD regions are outlined in black boxes  
43 in each panel.

44

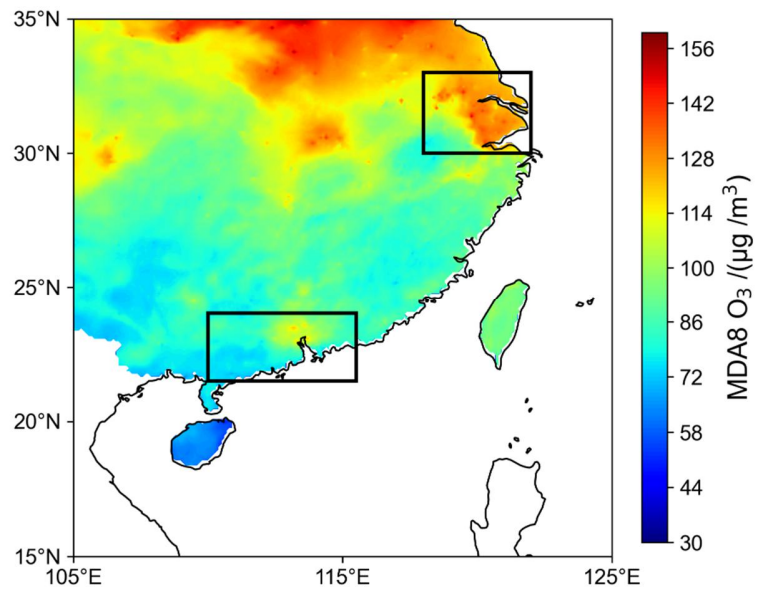

45

46 **Figure S4.** Spatial distributions of ground-level MDA8 ozone concentration averaged for summer  
47 climatological period. YRD and PRD regions are outlined in black boxes in panel.

48

49

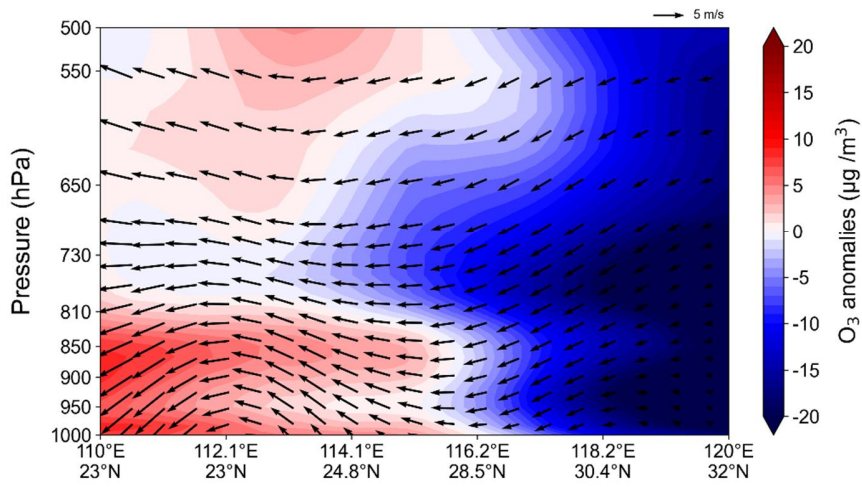

50

51 **Figure S5.** The cross-section of the wind fields and ozone concentration anomalies during the TC-  
 52 HDs compared to AHDs.

53
